# Supplementary material for: Selective Targeting of Breast Cancer by Tafuramycin A Using SMA-Nanoassemblies
Source: MDPI journal article supplement (doi:10.3390/molecules26123532), 2021-06-09

# Selective Targeting of Breast Cancer by Tafuramycin A Using SMA-Nanoassemblies

Ibrahim M. El-Deeb <sup>1</sup>, Valeria Pittala <sup>2,\*</sup>, Diab Eltayeb <sup>3</sup> and Khaled Greish <sup>3,\*</sup>

<sup>1</sup> Department of Medical Sciences, Royal College of Surgeons in Ireland, Medical University of Bahrain, Busaiteen 228, Bahrain; [imeldeeb@gmail.com](mailto:imeldeeb@gmail.com)

<sup>2</sup> Department of Drug and Health Science, University of Catania, Catania 95125, Italy

<sup>3</sup> Department of Molecular Medicine, Arabian Gulf University, Manama 329, Bahrain; [khaledfg@agu.edu.bh](mailto:khaledfg@agu.edu.bh)

\* Correspondence: [valeria.pittala@unict.it](mailto:valeria.pittala@unict.it) (V.P.); [khaledfg@agu.edu.bh](mailto:khaledfg@agu.edu.bh) (K.G.); Tel.: +39-095-7384269 (V.P.); Tel.: +973-17-237-393 (K.G.)

## Content:

|                                                       |   |
|-------------------------------------------------------|---|
| 1. <sup>1</sup> H NMR spectrum of Tafuramycin A.....  | 2 |
| 2. <sup>13</sup> C NMR spectrum of Tafuramycin A..... | 3 |

# <sup>1</sup>H NMR spectrum of Tafuramycin A

IE1529.71.fid  
IE1529-38  
DMSO  
IE1529 #71-74

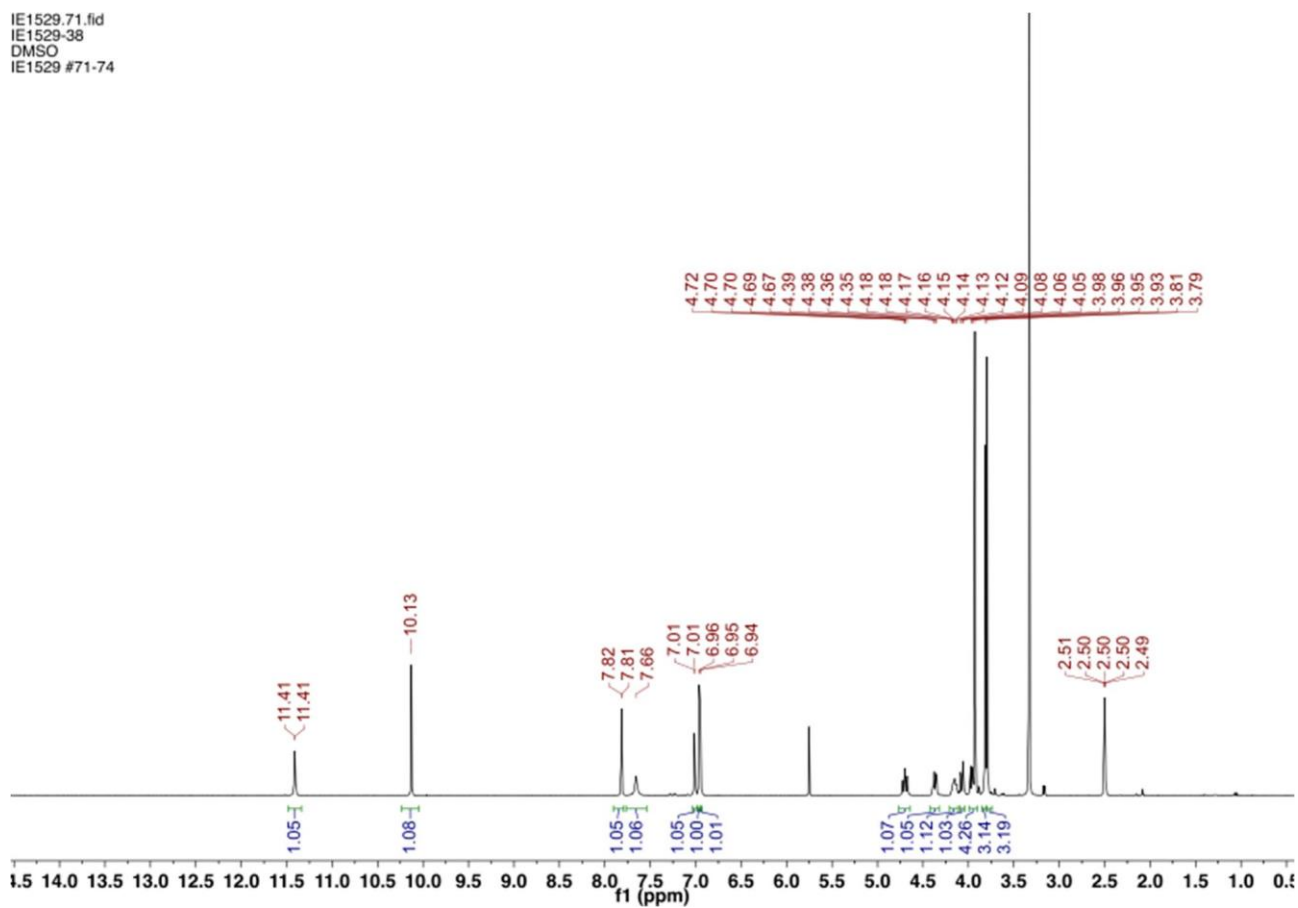

# <sup>13</sup>C NMR spectrum of Tafuramycin A

IE1529.73.fid  
IE1529-38  
DMSO  
IE1529 #71-74

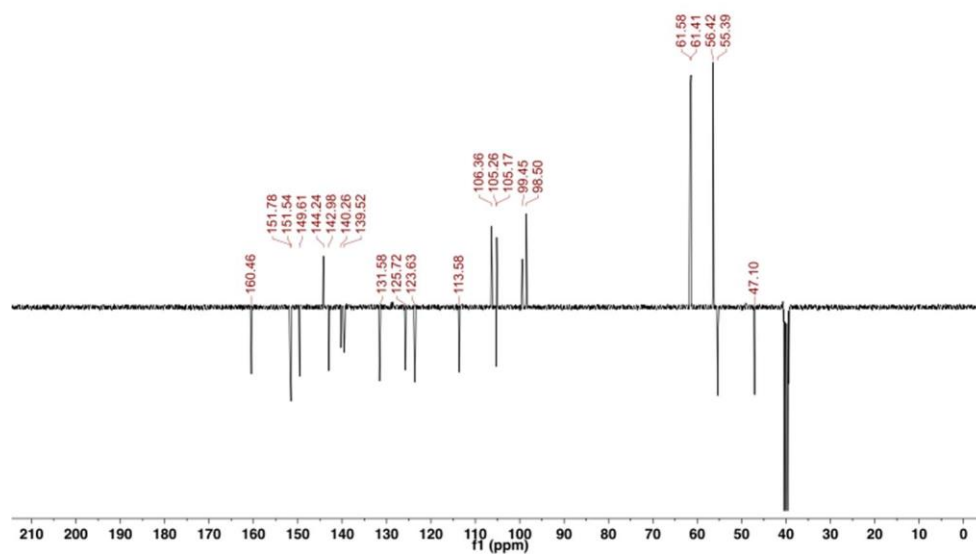

Supplement: s1 [file s1]
